# Supplementary material
Source: Research Square preprint supplement (doi:10.21203/rs.3.rs-9096551/v1)
Supplement: Supplementary file 1 [file b0bd75263b7e87e057ffe8d0.docx]

**Supplementary Appendix**

Supplement toBellR,O’Brien LMand Eunice Yuen E et al. Population Pharmacokinetic Analysis of Pirtobrutinib, a reversible BTK inhibitor, in Patients with Hematological Malignancies from the Phase 1/2 BRUIN Study

Contents

[**Supplemental Figures** 3](#_Toc213331460)

[**Figure S1.  Impact of Various Factors on Pirtobrutinib Clearance** 3](#_Toc213331461)

# **Supplemental Figures**


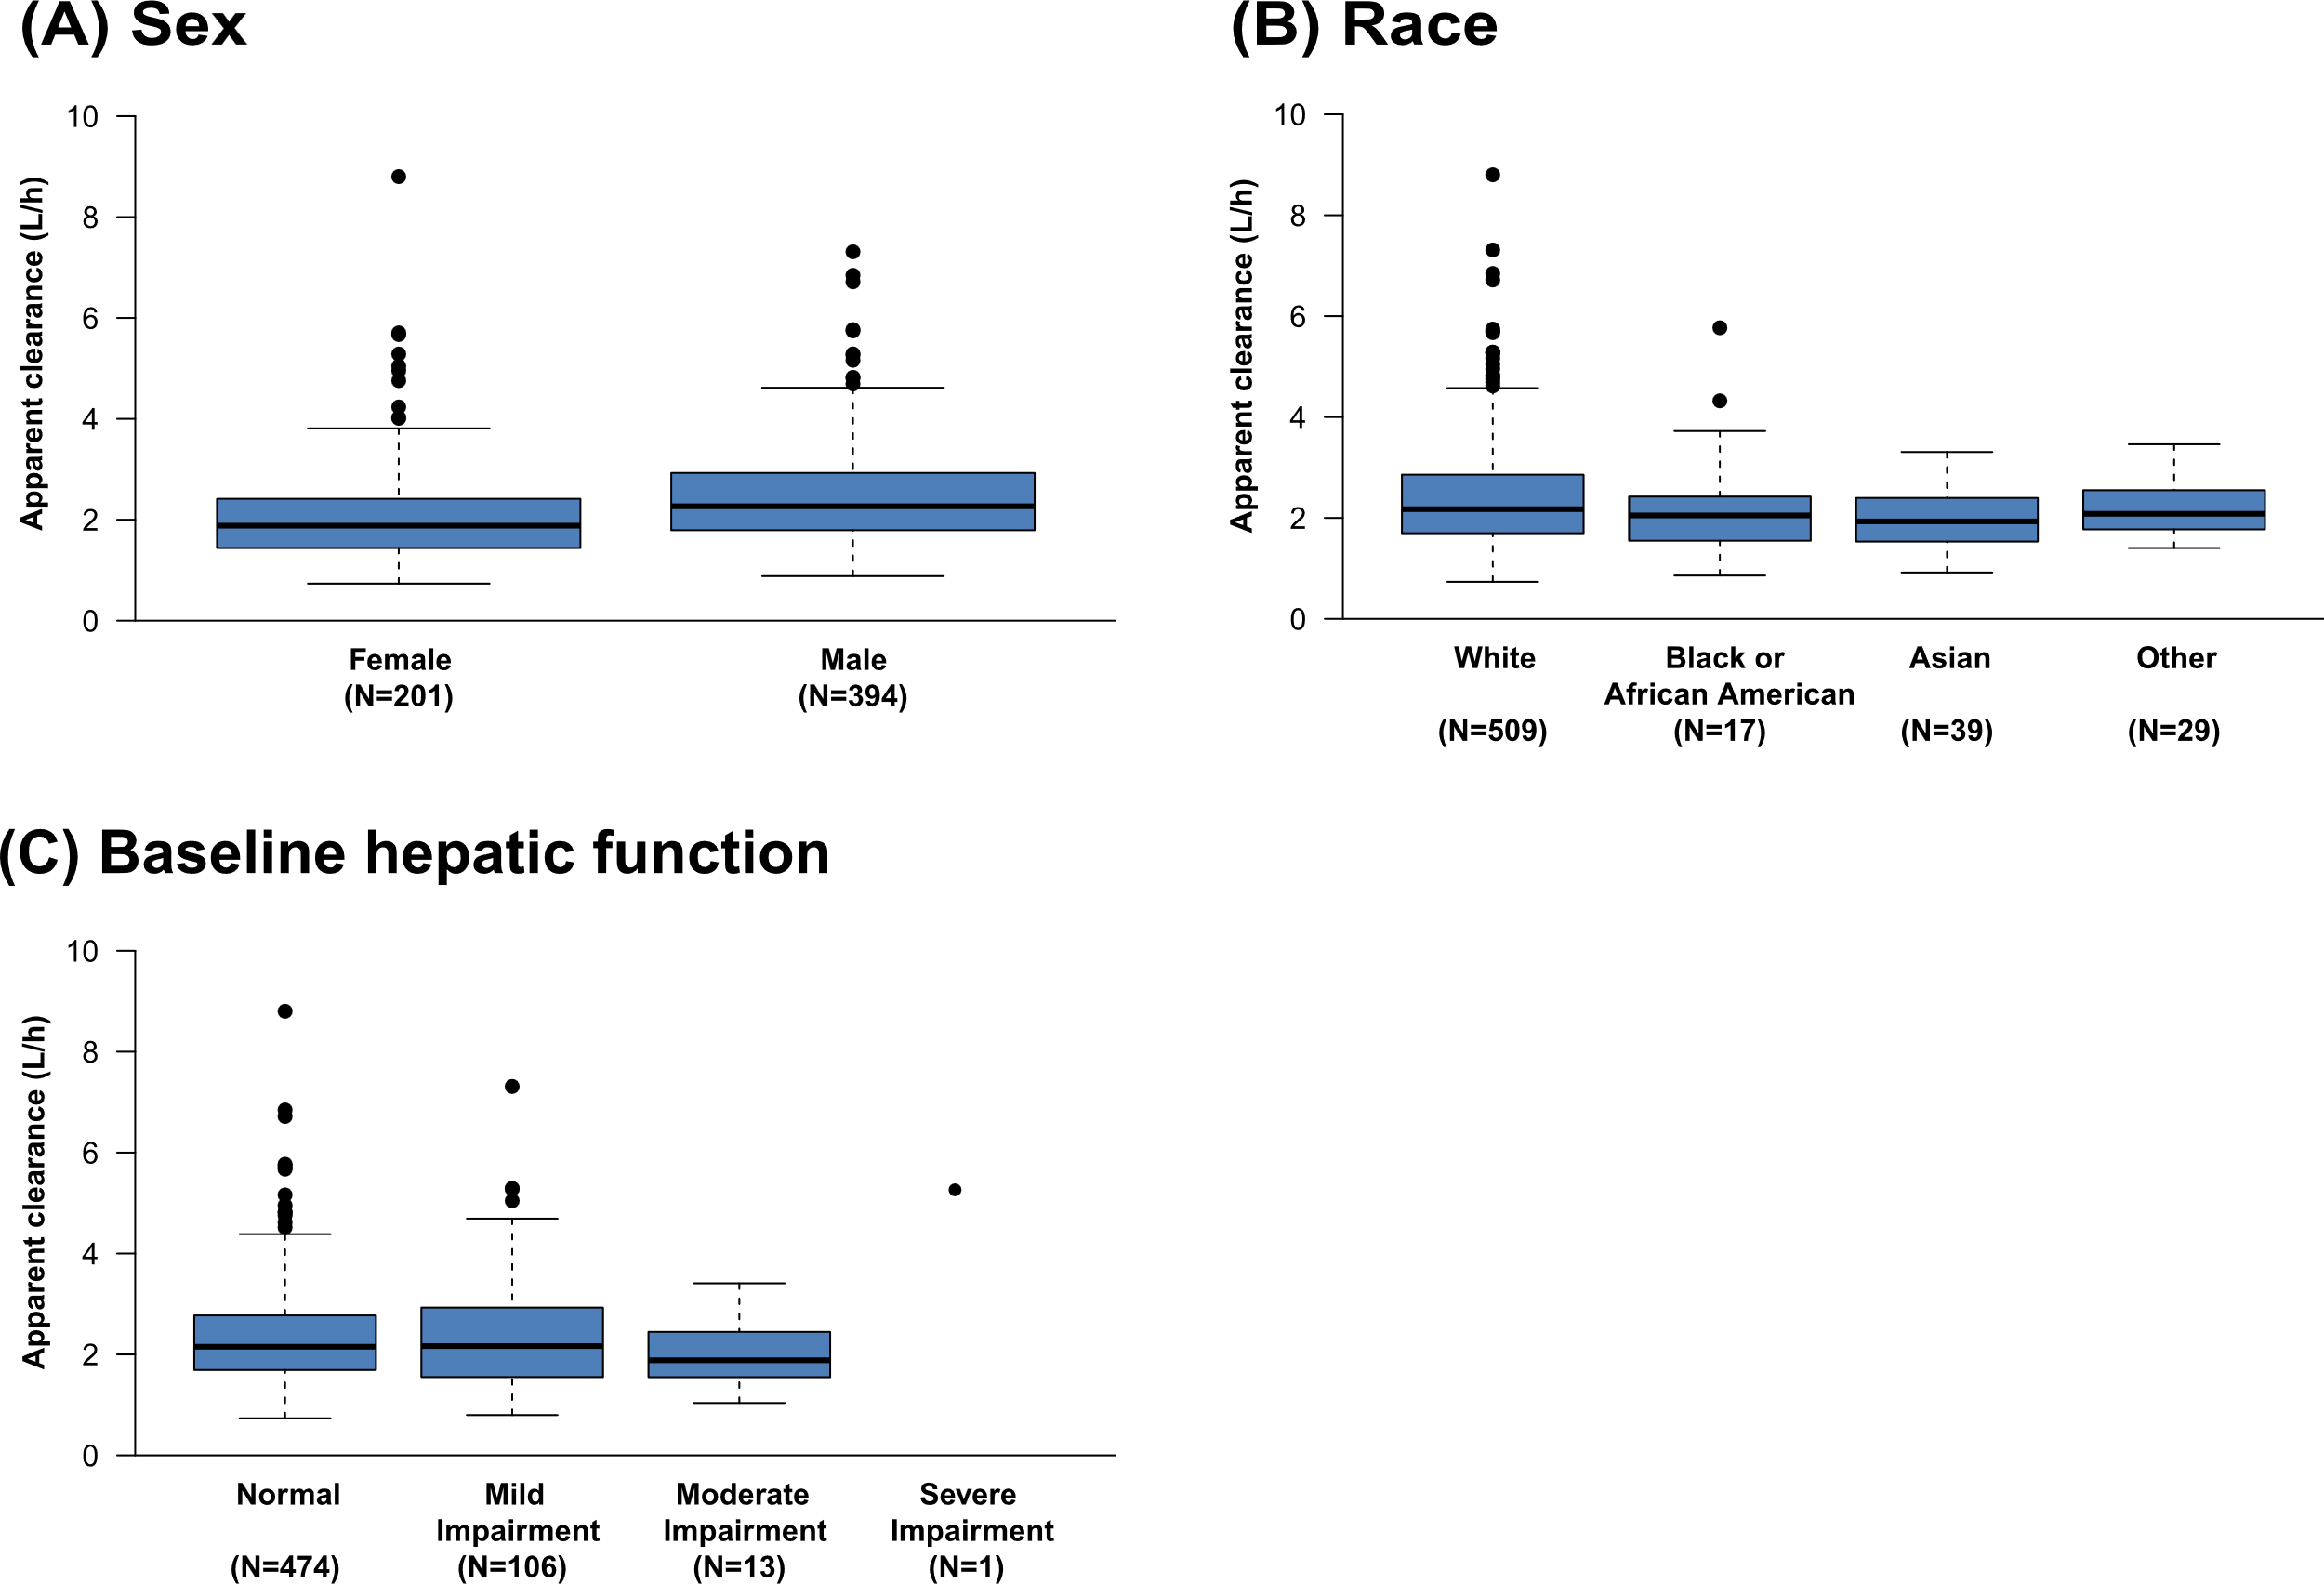


**Figure S1.  Impact of Various Factors on Pirtobrutinib Clearance**. Box plots of apparent clearance (L/h) stratified by **(A)** sex, **(B)** race, **(C)** baseline hepatic function. NOTE: Box plots depict the 25th, 50th, and 75th percentiles. Whiskers represent 1.5 times the interquartile range.

Other races include Native Hawaiian or other Pacific Islander (n=2), American Indian or Alaska Native (n=3), and Mixed race or multiple races (n=24). Hepatic function was categorized as Normal (TBI ≤ ULN and AST ≤ ULN), Mild (TBI ≤ 1.5 • ULN and AST > ULN or ULN < TBI ≤ 1.5 • ULN), Moderate (1.5 • ULN < TBI ≤ 3 • ULN), and Severe (TBI > 3 • ULN). Race and hepatic function classification data missing for 1 patient each.

Abbreviations: AST = aspartate transaminase; eGFR, estimated glomerular filtration rate; PK, pharmacokinetic; QD, once daily; TBI, total bilirubin; ULN, upper limit of normal.
